# 1 **Effects of Parkinson's disease and dopamine on digit** 2 **span measures of working memory**

3 John Patrick Grogan<sup>1</sup>, Lisa Emily Knight<sup>2</sup>, Laura Smith<sup>1</sup>, Nerea Irigoras Izagirre<sup>1</sup>,  
4 Alexandra Howat<sup>1</sup>, Brogan Elizabeth Knight<sup>3</sup>, Anastasia Bickerton<sup>1</sup>, Hanna Kristiina  
5 Isotalus<sup>1</sup>, Elizabeth Jane Coulthard<sup>1,3</sup>.

- 6 1. University of Bristol  
7 2. University Hospitals Bristol  
8 3. North Bristol NHS Trust

9 Correspondence to: John Grogan. Bristol Brain Centre, Elgar House, Southmead  
10 Hospital, Bristol, UK, BS10 5NB. +44 (0)1174148186. [John.grogan@bristol.ac.uk](mailto:John.grogan@bristol.ac.uk).

11

## 12 **ACKNOWLEDGEMENTS**

13 The authors thank BRACE for the use of their building, all the patients and  
14 participants who took part in this research, and the funders (Wellcome [097081/Z/11/Z] and  
15 Bristol Research into Alzheimer's and Care of the Elderly charity [BRI17/15]).

16

17 **ABSTRACT**

18 *Rationale*

19 Parkinson's disease (PD) impairs working memory (WM) - the ability to maintain  
20 items in memory for short periods of time and manipulate them. There is conflicting evidence  
21 on the nature of the deficits caused by the disease, and the potential beneficial and  
22 detrimental effects of dopaminergic medication on different WM processes.

23 *Objectives*

24 We hypothesised that PD impairs both maintenance and manipulation of items in WM  
25 and dopaminergic medications improve this in PD patients but impair it in healthy older  
26 adults.

27 *Methods*

28 We tested 68 PD patients ON and OFF their dopaminergic medication, 83 healthy  
29 age-matched controls, and 30 healthy older adults after placebo and levodopa administration.  
30 We used the digit span, a WM test with three components (forwards, backwards and sequence  
31 recall) that differ in the amount of manipulation required. We analysed the maximum spans  
32 and the percentage of lists correctly recalled, which probe capacity of WM and the accuracy  
33 of the memory processes within this capacity, respectively.

34 *Results*

35 PD patients had lower WM capacity across all three digit span components, but only  
36 showed reduced percentage accuracy on the components requiring manipulation (backwards  
37 and sequence spans). Dopaminergic medication did not affect performance in PD patients. In  
38 healthy older adults, levodopa did not affect capacity, but did impair accuracy on one of the  
39 manipulation components (sequence), without affecting the other (backwards).

40 *Conclusions*

41            This suggests a non-dopaminergic deficit of maintenance capacity and manipulation  
42 accuracy in PD patients, and a potential “overdosing” of intact manipulation mechanisms in  
43 healthy older adults by levodopa.

44    **KEYWORDS**

45            Parkinson’s disease, dopamine, working memory, levodopa, short-term memory,

46

## 47 INTRODUCTION

48 Working memory (WM) involves the maintenance and manipulation of elements held  
49 in memory for short periods of time. Early models suggested WM is composed of  
50 phonological and visuospatial storage components, and a central executive that manages  
51 attentional demands and the manipulation of stored elements (Baddeley, 2012).

52 Parkinson's disease (PD) patients have impaired WM, especially for visuospatial tasks  
53 or complex tasks requiring manipulation (Lewis, Slabosz, Robbins, Barker, & Owen, 2005).  
54 Maintenance of WM is also impaired in PD (Fallon, Mattiesing, Muhammed, Manohar, &  
55 Husain, 2017), though a meta-analysis of 56 WM span studies suggested that verbal  
56 maintenance was reduced to a lesser extent than verbal manipulation, and that spatial WM  
57 was impaired the most (Siegert, Weatherall, Taylor, & Abernethy, 2008). Dopaminergic  
58 medication might improve both maintenance and manipulation in PD patients (Beato et al.,  
59 2008; Owen, Iddon, Hodges, Summers, & Robbins, 1997; Zokaei, Burnett Heyes,  
60 Gorgoraptis, Budhdeo, & Husain, 2015), though some tasks have found no effect of  
61 medication (Fournet, Moreaud, Roulin, Naegele, & Pellat, 2000; Zokaei et al., 2015) or only  
62 shown benefits in specific subgroups such as patients with low baseline WM (Warden,  
63 Hwang, Marshall, Fenesy, & Poston, 2016) or in patients with onset of motor symptoms on  
64 their left-side (Hanna-Pladdy, Pahwa, & Lyons, 2015). Importantly, many of these studies  
65 may have been underpowered, with small sample sizes ( $n=7-28$ ) exacerbated by between-  
66 subjects designs, which may contribute to the conflicting results.

67 Dopamine can also impair WM, perhaps due to an overdosing of intact areas of the  
68 brain (Cools & D'Esposito, 2011). This is more often seen in healthy participants than  
69 patients (Bloemendaal et al., 2014; Fallon, van der Schaaf, Ter Huurne, & Cools, 2016),  
70 although benefits of dopamine are also seen (Fallon et al., 2016; Naef et al., 2017) as are no-  
71 effects (Linssen, Vuurman, Sambeth, & Riedel, 2012); this may reflect different optimal

72 levels of dopamine for different functions within WM such as maintenance and manipulation.  
73 Interestingly, in one of these studies testing WM following administration of methylphenidate  
74 (a dopamine and noradrenaline reuptake inhibitor), both beneficial and deleterious effects  
75 were demonstrated in the same group of participants (Fallon et al., 2016); methylphenidate  
76 improved distractor resistance on a spatial WM task, but impaired flexible updating of  
77 information held in WM. This suggests that the ‘overdose’ effects reported in some studies  
78 may not be seen when using broad measures of WM but require specific measurement of the  
79 different underlying processes.

80 We hypothesised that PD would impair maintenance and manipulation of WM, and  
81 that dopaminergic medication would remediate the deficits in PD patients while ‘overdosing’  
82 and impairing WM in healthy older adults. We used a simple WM measure, the digit span  
83 (Wechsler, 2008), which is commonly given in neuropsychological assessments. We used  
84 three variations of the digit span (forwards, backwards, sequence recall) with different  
85 contributions of maintenance and manipulation processes. This was given to a large sample  
86 of PD patients ON and OFF their normal dopaminergic medication and healthy age-matched  
87 controls (HC), and a separate group of healthy older adults after administration of placebo or  
88 levodopa.

## 89 **METHODS**

### 90 **Ethical approval**

91 Data are presented from several different studies running under different ethical  
92 approvals. Experiment 1 studies were approved by Frenchay and Southwest Central Bristol  
93 NHS RECs. Experiment 2 was approved by University of Bristol Faculty REC. All  
94 procedures were carried out in accordance with the relevant guidelines and regulations. All  
95 participants gave written informed consent, in accordance with the Declaration of Helsinki.

96 **Participants**

97 *Experiment 1*

98 Demographic details for all groups are presented in Table 1.

99 To generate a good sample size, we applied a robust, consistent protocol for testing  
 100 digit span across several different studies. In total, we collected data from 68 PD patients and  
 101 83 HC who all performed the digit span (as well as other cognitive tasks dependent on study).  
 102 Patients with a diagnosis of idiopathic PD were recruited from neurology and movement  
 103 disorder clinics at Southmead and Frenchay Hospitals in Bristol, UK. All were taking  
 104 levodopa and/or dopamine receptor agonists, were not taking irreversible mono-amine  
 105 oxidase inhibitors or acetylcholinesterase inhibitors, and did not have deep-brain stimulators  
 106 implanted. They had no serious neurological disorders other than PD and had normal or  
 107 corrected vision and hearing.

108 **Table 1** Demographics of participants tested in experiments 1 and 2. Statistical comparisons are against HC  
 109 from Experiment 1 (standard deviations in parentheses). The older adults from Experiment 2 did not differ from  
 110 the HC in Experiment 1 on any measure ( $p > .05$ ). \* $p < .05$  for PD vs HC, + $p < .05$  for PD ON vs PD OFF.  
 111 MoCA= Montreal Cognitive Assessment, DASS=Depression, Anxiety and Stress Scale, BIS=Barratt  
 112 Impulsivity Scale, LARS=Lille Apathy Rating Scale, LDE=Levodopa Dose Equivalency, MDS-UPDRS-  
 113 III=Movement Disorder Society Unified Parkinson's Disease Rating Scale section III.

| Measure                  | PD Experiment 1            | HC Experiment 1 | HC Experiment 2 |
|--------------------------|----------------------------|-----------------|-----------------|
| <b>Number</b>            | 68                         | 83              | 30              |
| <b>Age</b>               | 68.40 (6.53)               | 69.66 (8.49)    | 70.67 (6.83)    |
| <b>Gender (M:F)</b>      | 49:19*                     | 39:44           | 14:16           |
| <b>MoCA</b>              | 25.31 (2.88)*              | 26.94 (2.37)    | 26.23 (3.15)    |
| <b>Years Education</b>   | 13.70 (3.19)               | 14.65 (2.87)    | 14.33 (3.48)    |
| <b>DASS</b>              | 22.91 (16.78)*             | 14.07 (18.27)   | 11.27 (10.29)   |
| <b>BIS</b>               | 54.04 (8.50)               | 50.33 (9.00)    | 48.50 (8.54)    |
| <b>LARS</b>              | -22.71 (4.81)*             | -27.28 (4.57)   | -26.60 (5.54)   |
| <b>LDE</b>               | 605.41 (353.89)            |                 |                 |
| <b>Years Symptoms</b>    | 5.79 (3.86)                |                 |                 |
| <b>Years Diagnosed</b>   | 4.63 (3.47)                |                 |                 |
| <b>MDS-UPDRS-III ON</b>  | 27.95 (13.39) <sup>+</sup> |                 |                 |
| <b>MDS-UPDRS-III OFF</b> | 32.87 (13.41)              |                 |                 |

114 HC were recruited from our healthy volunteer database. They were 55 years or older,  
115 had no neurological disorders, were not taking dopaminergic medications, and had normal or  
116 corrected to normal vision and hearing.

### 117 *Experiment 2*

118 We recruited 35 healthy older (65+ years) adults from volunteer databases and Join  
119 Dementia Research databases. The same inclusion/exclusion criteria as for the HC group  
120 above were used, as well as contraindications and medical exclusions pertaining to the drugs  
121 administered (see Supplementary Materials 1 for full exclusion criteria). Two participants  
122 withdrew before completing one session, and three withdrew before completing both the drug  
123 and placebo session, leaving data from 30 participants analysed here.

### 124 **Procedure**

125 In the digit span, the experimenter reads aloud a list of digits at a rate of 1 per second  
126 and the participant must repeat the list back. All digits must be in the correct order for the list  
127 to be marked correct. The lists start at a length of 2 digits, and two lists of each length are  
128 read out. The list lengths increase by 1 digit until the participant gets both lists of the same  
129 length correct.

130 There are three components of the digit span: in the *forwards* span, the list must be  
131 recalled in the same order as said by the experimenter; in the *backwards* span, participants  
132 must repeat it in the reverse order to presentation order; in the *sequence* span, participants  
133 must recall the list in ascending numerical order. Forwards and sequence components present  
134 two lists of each length from 2-9 digits. The backwards component presents four lists of 2  
135 digits length, then two lists from lengths of 3-8 digits. There are 16 lists in total for each  
136 component.

137 *Experiment 1*

138 PD patients completed the three components (forwards, backwards, sequence) of the  
139 digit span once ON and once OFF medication (medication order randomised and  
140 counterbalanced), while HC completed it once. When coming OFF medication, PD patients  
141 were withdrawn from standard release dopaminergic medication for a minimum of 16 hours  
142 and from long-lasting dopaminergic medications for a minimum of 24 hours.

143 *Experiment 2*

144 This was a within-subjects double-blinded, placebo-controlled study. The participants  
145 completed both the drug and placebo conditions, in a randomised, counterbalanced order.

146 Healthy older adults received 10mg/ml domperidone or a placebo, followed by  
147 187.5mg co-beneldopa (150mg levodopa, 37.5mg benserazide) or a second placebo. Neither  
148 participant nor experimenter knew on which visit the participant received the drug or placebo.  
149 Their heart rate and blood pressure were monitored before and after administration. After 1.5  
150 hours they completed the digit span, along with other cognitive tests.

151 **Data analysis**

152 We used several scoring measures for the digit span to capture different sources of  
153 errors. The maximum span length correctly recalled gives a measure of the maximum  
154 capacity of a participant's WM. This is calculated for each span component (forwards,  
155 backwards and sequence) separately.

156 People can also make errors even before they have hit their capacity limit, which is  
157 not picked up by the maximum span measure. There are several measures sensitive to the  
158 number of errors in WM which reflect WM *accuracy* rather than *capacity*. The number of  
159 lists recalled correctly gives a simple count of these errors but is confounded by the fact that  
160 people with smaller capacities will exit the test earlier and thus not attempt as many lists as  
161 someone with a larger span. Therefore, we analysed the percentage of lists recalled correctly,



162 which corrects for the number of lists attempted and gives a more reliable and accurate  
163 measure of the accuracy of WM (Conway et al., 2005; Friedman & Miyake, 2005).

164 Assessing the percentage of digits recalled correctly rather than the lists may have  
165 even greater reliability and sensitivity as it captures extra information in the data (Friedman  
166 & Miyake, 2005; Unsworth & Engle, 2007). Unfortunately, the exact digits recalled were not  
167 consistently recorded for all participants; there are only digit error data for 45 PD and 52 HC  
168 from Experiment 1, and only for two participants from Experiment 2. These data are  
169 presented in Supplementary Materials 2 but are not reported here due to the much lower  
170 power and weaker effects.

171 Q-Q plots showed the spans were all approximately normal. Between-subject  
172 ANOVAs and t-tests were used to compare PD patients and HC, and within-subject t-tests to  
173 compare the effect of medications on PD patients and the effect of levodopa on healthy  
174 participants in Experiment 2. When comparing the three components, Bonferroni corrections  
175 were applied ( $\alpha=0.0167$ ). Data were analysed using SPSS (IBM, version 23.0).

#### 176 **Data availability**

177 Experiment 1 did not obtain consent to share individual participants' data, so we are  
178 not able to publish or provide the data without further permission from our study sponsor.

179 Anonymised data from Experiment 2 are available from the University of Bristol's  
180 data repository, data.bris, at <https://doi.org/10.5523/bris.15du56inneqal1ys8rhzuhbmmu>.

## 181 **RESULTS**

### 182 **Experiment 1**

183 PD patients had lower maximum spans for forwards ( $F(2, 216) = 4.572, p = .011, \eta_p^2$   
184  $= .041$ ), backwards ( $F(2, 216) = 6.590, p = .002, \eta_p^2 = .058$ ), and sequence ( $F(2, 216) =$   
185  $8.317, p < .001, \eta_p^2 = .072$ ) spans, with greater effect sizes in the manipulation spans  
186 (backwards and sequence spans; see Fig 1 and Table 2). Paired t-tests showed no significant

187 differences between PD ON and OFF dopaminergic medication on any span (forwards:  $t(67)$   
188  $= 0.944$ ,  $p = .348$ ,  $d = 0.102$ ; backwards:  $t(67) = -0.309$ ,  $p = .758$ ,  $d = 0.032$ ; sequence:  $t(67)$   
189  $= 0.456$ ,  $p = .650$ ,  $d = 0.049$ ).

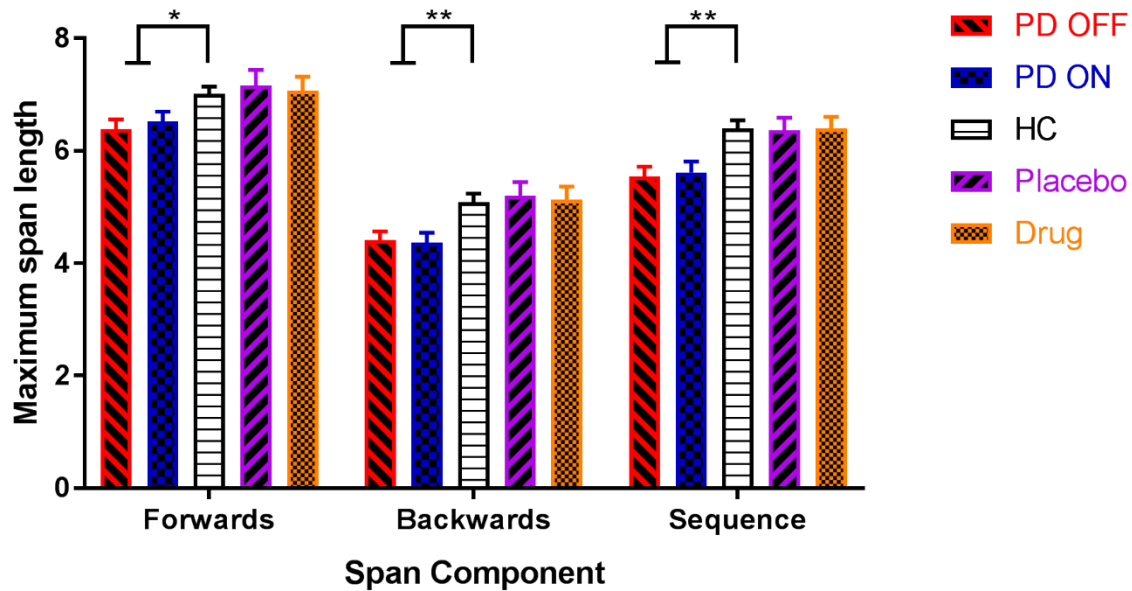

190

191 **Fig 1** The mean maximum spans for PD patients ON and OFF dopamine, HC, and healthy older participants on  
192 levodopa and placebo on each component of the digit span (SEM bars). PD patients had lower maximum spans  
193 than HC for all span components, but there were no effects of dopamine for PD patients or healthy older adults  
194 for any component. \* $p < .01667$  (Bonferroni-corrected threshold), \*\* $p < .001667$ .

195 PD patients made more errors (i.e. lower percentage of lists correct) than HC only for  
196 the manipulation spans (see Fig 2; backwards:  $F(2, 216) = 9.060$ ,  $p = .0002$ ,  $\eta_p^2 = .077$ ;  
197 sequence:  $F(2, 216) = 6.410$ ,  $p = .0020$ ,  $\eta_p^2 = .056$ ) but not for the forwards span ( $F(2, 216) =$   
198  $1.818$ ,  $p = .1648$ ,  $\eta_p^2 = .017$ ). Dopaminergic medication did not affect the percentage of lists  
199 correct (forwards:  $t(67) = -1.236$ ,  $p = .2208$ ,  $d = 0.147$ ; backwards:  $t(67) = 2.011$ ,  $p = .0483$ ,  
200  $d = 0.281$ ; sequence:  $t(67) = 1.436$ ,  $p = .1556$ ,  $d = 0.167$ ).

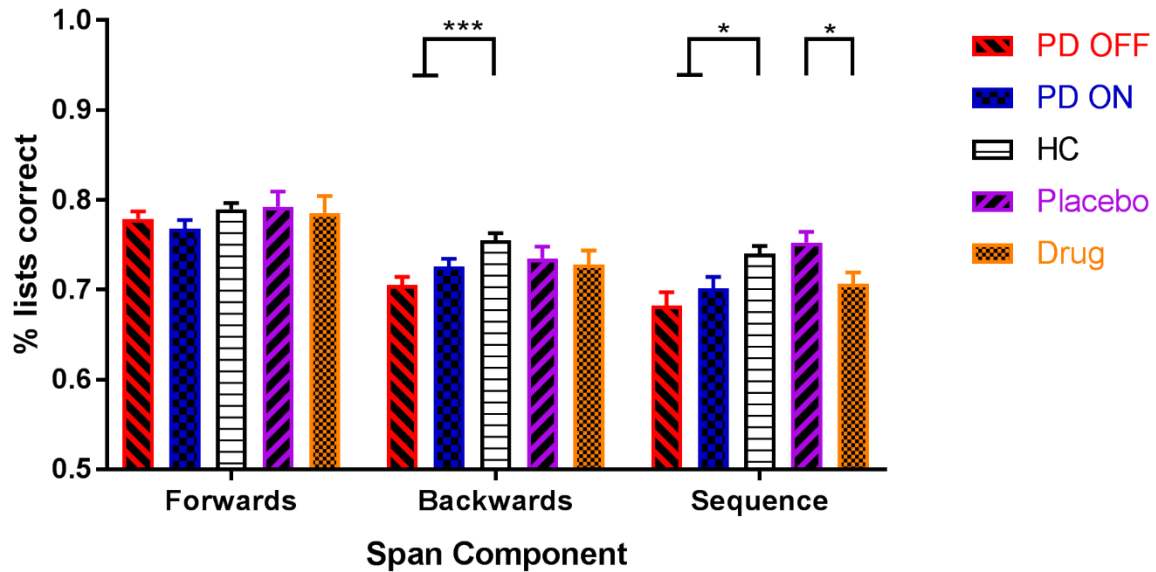

201

202 **Fig 2** The mean percentage of lists correct for each group, on each digit span component (SEM bars). PD  
203 patients had lower accuracy scores for the backwards and sequence components but not the forwards  
204 component. Dopamine did not affect accuracy in PD patients, but levodopa did decrease accuracy on the  
205 sequence component for healthy older adults. \* $p < .01667$  (Bonferroni-corrected threshold), \*\*\* $p < .0001667$ .

206 As PD patients had lower maximum spans on the forwards component, but did not  
207 have lower percentage of lists correct, we compared these two measures directly. We  
208 converted maximum span length into a percentage to be on the same scale as the percentage  
209 of lists correct and ran a mixed ANOVA (within-subject factor: measure type, between-  
210 subject factor: group (PD or HC)). The forwards component had a significant measure\*group  
211 interaction ( $F(1, 217) = 6.511, p = .011, \eta_p^2 = .029$ ) that passed the Bonferroni-corrected  
212 threshold ( $\alpha = .01667$ ), while backwards ( $F(1, 217) = 4.641, p = .032, \eta_p^2 = .021$ ) and  
213 sequence ( $F(1, 217) = 4.984, p = .027, \eta_p^2 = .022$ ) did not. This suggests that PD affects the  
214 maximum span length and percentage of lists correct differently for the forwards component,  
215 but not the backwards or sequence components.

216 **Table 2** Effect sizes and p-values from group comparisons of digit span measures. Between-subject one-way  
217 ANOVAs were used to compare HC vs PD ON vs PD OFF, while paired t-tests were used to compare PD ON

218 vs PD OFF and Drug vs Placebo. Bonferroni corrections were applied at a significance threshold of  $\alpha=0.01667$ .

219 \* $p < .0167$ , \*\* $p < .00167$ , \*\*\* $p < .000167$ .

| Comparison            | Measure         | Forwards |           | Backwards |             | Sequence |            |
|-----------------------|-----------------|----------|-----------|-----------|-------------|----------|------------|
|                       |                 | d        | p value   | d         | p value     | d        | p value    |
| HC vs PD-ON vs PD-OFF | Max Span        | 0.414    | 0.011358* | 0.496     | 0.001667**  | 0.557    | 0.000331** |
|                       | % lists correct | 0.263    | 0.164839  | 0.578     | 0.000167*** | 0.487    | 0.001975*  |
| PD-ON vs PD-OFF       | Max Span        | 0.102    | 0.348482  | 0.032     | 0.758273    | 0.049    | 0.650100   |
|                       | % lists correct | 0.147    | 0.220807  | 0.281     | 0.048302    | 0.167    | 0.155641   |
| Drug vs Placebo       | Max Span        | 0.070    | 0.609901  | 0.051     | 0.757700    | 0.028    | 0.902247   |
|                       | % lists correct | 0.072    | 0.654236  | 0.085     | 0.654438    | 0.689    | 0.006718*  |

220

221 No effects of levodopa dose equivalency were seen, nor were there effects of laterality

222 of motor symptoms or medication type (see Supplementary Materials 2).

## 223 Experiment 2

224 Looking at the healthy older adults given levodopa and placebo, levodopa did not

225 affect maximum span digit span component (forwards:  $t(29) = 0.516$ ,  $p = .610$ ,  $d = 0.070$ ;

226 backwards:  $t(29) = 0.311$ ,  $p = .758$ ,  $d = .051$ ; sequence:  $t(29) = -.0124$ ,  $p = .920$ ,  $d = 0.028$ )

227 (see Fig 1 and Table 2).

228 However, levodopa did decrease the percentage of lists correctly recalled for the

229 sequence component ( $t(29) = -2.919$ ,  $p = .007$ ,  $d = 0.689$ ), though not for the forwards ( $t(29)$

230  $= -0.453$ ,  $p = .654$ ,  $d = 0.072$ ) or backwards ( $t(29) = -0.452$ ,  $p = .654$ ,  $d = 0.085$ ) components

231 (see Fig 2). No effects of weight-adjusted levodopa dose were seen (see Supplementary

232 Materials 2).

233 Only two participants from Experiment 2 had their error responses recorded, so the

234 percentage of digits correct were not analysed for Experiment 2.

## 235 DISCUSSION

236 PD patients had lower maximum spans for each component of the digit span, as well

237 as lower percentage of lists recalled correctly for backwards and sequence spans.

238 Dopaminergic medication did not improve performance on any component or measure in PD  
239 patients. In healthy older adults, levodopa did not affect maximum span, but did decrease the  
240 percentage of lists correctly recalled for the sequence span.

241 PD patients were only impaired on the maintenance component (forwards digit span)  
242 when measuring the maximum span length recalled, not the percentage of lists correct.  
243 However, for the manipulation components (backwards and sequence spans) PD impaired the  
244 maximum capacity and percentage of lists correct similarly. This distinction suggests that the  
245 two measures are tapping into distinct processes during WM – the capacity and the accuracy.  
246 It also suggests that PD impairs the capacity for maintenance and manipulation processes, but  
247 only reduces accuracy of manipulation processes. This aligns with previous literature which  
248 has suggested that while PD does lead to more decay of precision of items held in memory  
249 (Fallon et al., 2017; Zokaei et al., 2015), there are greater deficits when manipulation is  
250 required (Lewis et al., 2005) and that this is due to increased number of errors (Fallon et al.,  
251 2017).

252 Alternatively, the difference in the measures may simply reflect poorer sensitivity of  
253 the percentage list accuracy measure. However, previous literature suggests the percentage  
254 accuracy scores actually have *greater* sensitivity and reliability than simpler measures such as  
255 the maximum span length (Conway et al., 2005; Friedman & Miyake, 2005), which would  
256 argue against this view. Additionally, PD OFF scored (non-significantly) higher on the  
257 percentage of lists measure than PD ON, a different direction of effect to the maximum span  
258 measure. This suggests that the lack of effect is not simply due to smaller differences between  
259 the groups but may reflect different processes underlying the data.

260 The general deficit in WM capacity could reflect a reduction in the number of items  
261 that can be maintained in WM having a knock-on effect onto the manipulation components in  
262 the backwards and sequence spans. If PD reduces the number of items a person can hold in

263 their memory, then this would also reduce the maximum spans possible in the backwards and  
264 sequence components. This is unlikely to be the sole driver of this deficit however, as  
265 backwards and sequence components had lower mean maximum spans than the forwards  
266 component, meaning they were not hitting the ceiling imposed by the maintenance capacity  
267 and that there is an extra source of error in these manipulation spans.

268         If PD harms WM but dopaminergic medication does not improve it, then a non-  
269 dopaminergic pathology is suspected. PD patients have alterations to many neuromodulatory  
270 systems including noradrenaline, acetylcholine and serotonin (Jellinger, 1991; Scatton,  
271 Javoy-Agid, Rouquier, Dubois, & Agid, 1983), which may underlie the deficit. Alternatively,  
272 it could be a dopaminergic pathology, but simply one that is too severe to be repaired by  
273 dopamine replacement therapy, although this seems unlikely given that motor symptoms,  
274 usually seen before cognitive changes, are still helped by dopaminergic medication, as  
275 evident in the reduced UPDRS scores in PD patients when ON medication.

276         More interesting is the apparent sparing of maintenance accuracy from the WM  
277 deficit caused by PD. This could suggest that the underlying processes accounting for errors  
278 on the spans is different when manipulation of the items is required, as PD seems to reduce  
279 the maximum number of items that can be maintained in WM, without increasing errors  
280 made. To explain this, we invoke the multicompartiment model of WM (Baddeley, 2003),  
281 which posits a phonological loop for storage of items, and a central executive that mediates  
282 manipulation of items stored. We propose that PD impairs the capacity of the phonological  
283 loop, without increasing errors in storage under this limit, and also impairs the central  
284 executive's ability to interact with items stored.

285         The pattern of results from Experiment 2 suggest that levodopa does not affect the  
286 maximum capacity of any of the span types but may reduce the percentage of lists recalled  
287 correctly only for the sequence span. This induced deficit supports the dopamine overdose

288 hypothesis which posits that dopaminergic drugs will overdose intact functioning in the brain,  
289 leading to impairments (Cools & D'Esposito, 2011). That manipulation accuracy was reduced  
290 by levodopa corroborates reports that methylphenidate impairs the flexible updating of WM  
291 information (Fallon et al., 2016), which would be needed in the sequence span. However, this  
292 effect should be interpreted with caution. Unlike the pattern of effects seen in PD patients,  
293 this one is isolated. There were no impairments on the other manipulation component (the  
294 backwards span); indeed, the percentage of lists correct for backwards span was not even  
295 close to significantly different. Therefore, while it may be that levodopa does impair  
296 manipulation accuracy of WM items, it is also possible that this is simply an artefact or false  
297 positive.

298         There are several drawbacks in using the digit span that should be considered. As only  
299 two lists of each length are presented, it provides a very noisy measure of performance.  
300 Adapted versions presented via computer are available which use give repeated presentations  
301 of list lengths, and do not quit when they fail to recall the lists but instead decrease the length  
302 and then increase it back up if they recall that one correctly (Woods et al., 2011). This step-  
303 up/step-down procedure is more sensitive to people's maximum capacities. Computerised  
304 assessment would also rule out any variability induced by slightly different speaking speeds,  
305 accents, volume, and diction, from different experimenters, which may have affected  
306 performance. Other computerised tasks are available which provide analogue error measures  
307 on WM, which have shown far greater sensitivity than the digit span (Zokaei et al., 2015).  
308 Work with these tasks has suggested that WM capacity may not be determined by the number  
309 of discrete 'slots' for information but rather by the allocation of a shared capacity resource  
310 (Bays, Catalao, & Husain, 2009; Schneegans & Bays, 2016). Future work with these more  
311 sensitive tasks will be able to separate out the specific WM processes impaired by PD and  
312 affected by dopamine.

313 In summary, PD impaired maximum capacity of maintenance spans, and the capacity  
314 and accuracy of manipulation spans. Despite this, PD patients show no benefit of  
315 dopaminergic medication on maintenance or manipulation of WM, suggesting a non-  
316 dopaminergic deficiency. Levodopa also did not affect WM capacity in healthy older adults,  
317 but may have decreased accuracy on manipulation span, although this effect should be  
318 viewed with caution.

## 319 REFERENCES

- 320 Baddeley, A. (2003). Working memory: looking back and looking forward. *Nature Reviews.*  
321 *Neuroscience*, 4(10), 829–839. <http://doi.org/10.1038/nrn1201>
- 322 Baddeley, A. (2012). Working Memory : Theories, Models, and Controversies. *Annual*  
323 *Review of Psychology*, 63, 1–29. <http://doi.org/10.1146/annurev-psych-120710-100422>
- 324 Bays, P. M., Catalao, R. F. G., & Husain, M. (2009). The precision of visual working memory  
325 is set by allocation of a shared resource. *Journal of Vision*, 9(10), 7–7.  
326 <http://doi.org/10.1167/9.10.7>
- 327 Beato, R., Levy, R., Pillon, B., Vidal, C., Tezenas, S., Montcel, D., ... Cardoso, F. (2008).  
328 Working memory in Parkinson's disease Patients: Clinical features and response to  
329 levodopa. *Arq Neuropsiquiatr*, 66(2), 147–151.
- 330 Bloemendaal, M., van Schouwenburg, M. R., Miyakawa, A., Aarts, E., D'Esposito, M., &  
331 Cools, R. (2014). Dopaminergic modulation of distracter-resistance and prefrontal delay  
332 period signal. *Psychopharmacology*, 1–10. <http://doi.org/10.1007/s00213-014-3741-9>
- 333 Conway, A. R. A., Kane, M. J., Bunting, M. F., Hambrick, D. Z., Wilhelm, O., & Engle, R. W.  
334 (2005). Working memory span tasks: A methodological review and user's guide.  
335 *Psychonomic Bulletin & Review*, 12(5), 769–786. <http://doi.org/10.3758/BF03196772>
- 336 Cools, R., & D'Esposito, M. (2011). Inverted-U-shaped dopamine actions on human working  
337 memory and cognitive control. *Biological Psychiatry*, 69(12), e113–e125.  
338 <http://doi.org/10.1016/j.biopsych.2011.03.028>
- 339 Fallon, S. J., Mattiesing, R. M., Muhammed, K., Manohar, S., & Husain, M. (2017).  
340 Fractionating the Neurocognitive Mechanisms Underlying Working Memory:  
341 Independent Effects of Dopamine and Parkinson's Disease. *Cerebral Cortex*, (October),  
342 1–12. <http://doi.org/10.1093/cercor/bhx242>
- 343 Fallon, S. J., van der Schaaf, M. E., Ter Huurne, N., & Cools, R. (2016). The Neurocognitive  
344 Cost of Enhancing Cognition with Methylphenidate: Improved Distractor Resistance but  
345 Impaired Updating. *Journal of Cognitive Neuroscience*, 1–12.  
346 <http://doi.org/10.1162/jocn>



- 347 Fournet, N., Moreaud, O., Roulin, J. L., Naegele, B., & Pellat, J. (2000). Working memory  
348 functioning in medicated Parkinson's disease patients and the effect of withdrawal of  
349 dopaminergic medication. *Neuropsychology*, *14*(2), 247–253.  
350 <http://doi.org/10.1037/0894-4105.14.2.247>
- 351 Friedman, N. P., & Miyake, A. (2005). Comparison of four scoring methods for the reading  
352 span test. *Behavior Research Methods*, *37*(4), 581–590.  
353 <http://doi.org/10.3758/BF03192728>
- 354 Grogan, J., Isotalus, H., & Coulthard, E. (2018). DARet1 Digit Span Data.  
355 <https://doi.org/10.5523/bris.15du56inneqal1ys8rhzuhbmmu>
- 356 Hanna-Pladdy, B., Pahwa, R., & Lyons, K. E. (2015). Paradoxical Effect of Dopamine  
357 Medication on Cognition in Parkinson's Disease: Relationship to Side of Motor Onset.  
358 *Journal of the International Neuropsychological Society*, *21*, 259–270.  
359 <http://doi.org/10.1017/S1355617715000181>
- 360 Jellinger, K. A. (1991). Pathology of Parkinson's disease: Changes Other than the  
361 Nigrostriatal Pathway. *Molecular and Chemical Neuropathology*, *14*, 153–197.
- 362 Lewis, S. J. G., Slabosz, A., Robbins, T. W., Barker, R. A., & Owen, A. M. (2005).  
363 Dopaminergic basis for deficits in working memory but not attentional set-shifting in  
364 Parkinson's disease. *Neuropsychologia*, *43*(6), 823–832.  
365 <http://doi.org/10.1016/j.neuropsychologia.2004.10.001>
- 366 Linssen, A. M. W., Vuurman, E. F. P. M., Sambeth, A., & Riedel, W. J. (2012).  
367 Methylphenidate produces selective enhancement of declarative memory consolidation  
368 in healthy volunteers. *Psychopharmacology*, *221*(4), 611–619.  
369 <http://doi.org/10.1007/s00213-011-2605-9>
- 370 Naef, M., Müller, U., Linssen, A., Clark, L., Robbins, T. W., & Eisenegger, C. (2017). Effects  
371 of dopamine D2/D3 receptor antagonism on human planning and spatial working  
372 memory. *Nature Publishing Group*, *7*, e1107. <http://doi.org/10.1038/tp.2017.56>
- 373 Owen, A. M., Iddon, J. L., Hodges, J. R., Summers, B. A., & Robbins, T. W. (1997). Spatial  
374 and non-spatial working memory at different stages of Parkinson's disease.  
375 *Neuropsychologia*, *35*(4), 519–532. [http://doi.org/10.1016/S0028-3932\(96\)00101-7](http://doi.org/10.1016/S0028-3932(96)00101-7)
- 376 Scatton, B., Javoy-Agid, F., Rouquier, L., Dubois, B., & Agid, Y. (1983). Reduction of  
377 cortical dopamine, noradrenaline, serotonin and their metabolites in Parkinson's disease.  
378 *Brain Research*, *275*(2), 321–328. [http://doi.org/10.1016/0006-8993\(83\)90993-9](http://doi.org/10.1016/0006-8993(83)90993-9)
- 379 Schneegans, S., & Bays, P. M. (2016). No fixed item limit in visuospatial working memory.  
380 *Cortex*, *83*, 181–193. <http://doi.org/10.1016/j.cortex.2016.07.021>
- 381 Siegert, R. J., Weatherall, M., Taylor, K. D., & Abernethy, D. A. (2008). A meta-analysis of  
382 performance on simple span and more complex working memory tasks in Parkinson's  
383 disease. *Neuropsychology*, *22*(4), 450–61. <http://doi.org/10.1037/0894-4105.22.4.450>

- 384 Unsworth, N., & Engle, R. W. (2007). On the division of short-term and working memory:  
385 An examination of simple and complex span and their relation to higher order abilities.  
386 *Psychological Bulletin*, 133(6), 1038–1066. [http://doi.org/10.1037/0033-](http://doi.org/10.1037/0033-2909.133.6.1038)  
387 [2909.133.6.1038](http://doi.org/10.1037/0033-2909.133.6.1038)
- 388 Warden, C., Hwang, J., Marshall, A., Fenesy, M., & Poston, K. L. (2016). The effects of  
389 dopamine on digit span in Parkinson’s disease. *Journal of Clinical Movement Disorders*,  
390 3, 5. <http://doi.org/10.1186/s40734-016-0033-z>
- 391 Wechsler, D. (2008). *Wechsler Adult Intelligence Scale—Fourth Edition (WAIS-IV)*. San  
392 Antonio, TX: NCS Pearson.
- 393 Woods, D. L., Kishiyama, M. M., Yund, E. W., Herron, T. J., Edwards, B., Poliva, O., ...  
394 Reed, B. (2011). Improving digit span assessment of short-term verbal memory. *Journal*  
395 *of Clinical and Experimental Neuropsychology*, 33(1), 101–111.  
396 <http://doi.org/10.1080/13803395.2010.493149>
- 397 Zokaei, N., Burnett Heyes, S., Gorgoraptis, N., Budhdeo, S., & Husain, M. (2015). Working  
398 memory recall precision is a more sensitive index than span. *Journal of*  
399 *Neuropsychology*, 9, 319–329. <http://doi.org/10.1111/jnp.12052>
